# Supplementary material for: Polatuzumab vedotin, rituximab, cyclophosphamide, doxorubicin, and prednisone (Pola-R- CHP) therapy in diffuse large B-cell lymphoma in patients aged 80 years or older: A real- world study
Source: Research Square preprint supplement (doi:10.21203/rs.3.rs-7112709/v1), 2025-07-23
Supplement: Supplementary file 1 [file 41c2e63bd00ffba40206ade2.xlsx]

## Sheet: Sheet1
Table 3. Treatment response rates stratified by age group (<80 years vs ≥80 years)
	All patients (N = 151)	Age <80 years (n = 113)	Age ≥80 years (n = 38)	P-value
ORR, n (%) [95% CI]	144 (95.4%) [90.7-97.7]	110 (97.3%) [92.5-99.1]	34 (89.5%) [75.9-95.8]	0.235
CR, n (%) [95% CI]	114 (75.5%) [68.1-81.7]	89 (78.8%) [70.3-85.3]	25 (65.8%) [49.9-78.8]	0.152
PR, n (%) [95% CI]	30 (19.9%) [14.3-26.9]	21 (18.6%) [12.5-26.7]	9 (23.7%) [13.0-39.2]
Abbreviations: ORR, overall response rate; CR, complete response; PR, partial response; CI, confidence interval. Footnote: At the time of data cutoff, after a median follow-up of 10.7 months (range 0.3-25.2), 151 patients were evaluated for efficacy by PET-CT at the end of treatment.
