# Supplementary material for: Polatuzumab vedotin, rituximab, cyclophosphamide, doxorubicin, and prednisone (Pola-R- CHP) therapy in diffuse large B-cell lymphoma in patients aged 80 years or older: A real- world study
Source: Research Square preprint supplement (doi:10.21203/rs.3.rs-7112709/v1), 2025-07-23
Supplement: Supplementary file 3 [file 47c90ebd8225afa02e0617dc.xlsx]

## Sheet: Sheet1
Table 6. Multivariable logistic regression analysis of factors associated with severe adverse events
	OR	95％ CI	P-value
Age (≥80 years)	1.55	0.491-4.900	0.455
Male	1.34	0.630-2.850	0.447
PS (score)	1.14	0.755-1.730	0.531
Average IDI of DXR and CPA	0.992	0.960-1.020	0.625
IDI of Pola	1.05	1.010-1.090	0.025
GNRI	0.949	0.914-0.986	0.007
Abbreviations: OR, odds ratio; CI, confidence interval; PS, performance status; IDI, initial dose intensity; DXR, doxorubicin; CPA, cyclophosphamide; Pola, polatuzumab vedotin; GNRI, Geriatric Nutritional Risk Index.
