# Supplementary material for: Polatuzumab vedotin, rituximab, cyclophosphamide, doxorubicin, and prednisone (Pola-R- CHP) therapy in diffuse large B-cell lymphoma in patients aged 80 years or older: A real- world study
Source: Research Square preprint supplement (doi:10.21203/rs.3.rs-7112709/v1), 2025-07-23
Supplement: Supplementary file 4 [file 6b15fe7a02fafc95c8179a49.xlsx]

## Sheet: Sheet1
Table 2. Initial and average relative dose intensity of chemotherapeutic agents stratified by age group
	ALL patients (N = 172)	Age <80 years (n = 128)	Age ≥80 years (n = 44)	P-value
DXR
IDI, median (range)	93 (0-118)	100 (50-118)	59.5 (0-93)	<0.001
ARDI, median (range)	83 (0-105)	89 (12-105)	55 (0-91)	<0.001
CPA
IDI, median (range)	90 (46-118)	99.5 (48-118)	61.5 (46-100)	<0.001
ARDI, median (range)	81 (12-103)	87 (12-103)	58 (13-89)	<0.001
Pola
IDI, median (range)	100 (50-138)	100 (50-138)	95 (50-102)	0.012
ARDI, median (range)	88 (16-116)	89 (17-116)	84 (16-103)	0.027
Combined (DXR, CPA, Pola)
IDI, median (range)	92 (50-125)	97 (54-125)	67 (50-91)	<0.001
ARDI, median (range)	84 (13-122)	88 (13-122)	65 (13-90)	<0.001
Abbreviations: DXR, doxorubicin; CPA, cyclophosphamide; Pola, polatuzumab vedotin; IDI, initial dose intensity; ARDI, average relative dose intensity
