# Supplementary material for: Polatuzumab vedotin, rituximab, cyclophosphamide, doxorubicin, and prednisone (Pola-R- CHP) therapy in diffuse large B-cell lymphoma in patients aged 80 years or older: A real- world study
Source: Research Square preprint supplement (doi:10.21203/rs.3.rs-7112709/v1), 2025-07-23
Supplement: Supplementary file 5 [file 7767e8892b8f2bde423c0b09.xlsx]

## Sheet: Sheet1
Table 1. Baseline characteristics of patients stratified by age group (<80 years vs ≥80 years)
	All patients (N = 172)	Age <80 years (n = 128)	Age ≥80 years (n = 44)	P-value
Median age, years (range)	73 (31-93)	70 (31-79)	83 (80-93)	<0.001
Male, n (%)	99 (57.6)	77 (60.2)	22 (50.0)	0.289
ECOG PS ≥2, n (%)	27 (15.7)	17 (13.3)	10 (22.7)	0.153
LDH >UNL, n (%)	118 (68.6)	84 (65.6)	34 (77.3)	0.188
Ann Arbor stage ≥3, n (%)	111 (64.5)	83 (64.8)	28 (63.6)	0.999
Extranodal sites ≥2, n (%)	67 (39.0)	52 (40.6)	15 (34.1)	0.695
Bulky mass, n (%)	41 (23.8)	31 (24.2)	10 (22.7)	0.999
sIL-2R, U/mL, median (range)	1596 (223-60568)	1583 (223-60568)	1663 (598-29936)	0.636
Albumin, g/L, median (range)	37 (20-47)	37 (20-47)	35 (20-45)	0.081
GNRI, median (range)	93.8 (64.1-110.2)	95.3 (64.1-110.2)	93.6 (66.1-108.7)	0.068
IPI category, n (%)				0.125
Low	30 (17.4)	27 (21.1)	3 (6.8)
Low-intermediate	49 (28.5)	37 (28.9)	12 (27. 3)
High-intermediate	37 (21.5)	25 (19.5)	12 (27.3)
High	56 (32.6)	39 (30.5)	17 (38.6)
Hans algorism, n (%)				0.493
GCB	78 (45.4)	61 (47.7)	24 (54.6)
Non-GCB	85 (49.4)	61 (47.7)	17 (38.6)
Unknown	9 (5.2)	6 (4.6)	3 (6.8)
Abbreviations: ECOG PS, Eastern Cooperative Oncology Group Performance Status; LDH, lactate dehydrogenase; UNL, upper normal limit; sIL-2R, soluble interleukin-2 receptor; GNRI, Geriatric Nutritional Risk Index; IPI, International Prognostic Index; GCB, germinal center B-cell; Non-GCB, non-germinal center B-cell.
