# Supplementary material for: Polatuzumab vedotin, rituximab, cyclophosphamide, doxorubicin, and prednisone (Pola-R- CHP) therapy in diffuse large B-cell lymphoma in patients aged 80 years or older: A real- world study
Source: Research Square preprint supplement (doi:10.21203/rs.3.rs-7112709/v1), 2025-07-23
Supplement: Supplementary file 6 [file 9a309a59d38ea5ed65a85f5e.xlsx]

## Sheet: Sheet1
Table 5. Incidence of grade ≥3 adverse events and treatment-related mortality stratified by age group
	ALL patients (N = 172)	Age <80 (n = 128)	Age ≥80 (n = 44)	P-value
Anemia n, (%)	29 (16.9)	22 (17.2)	7 (15.9)	0.557
Neutropenia n, (%)	100 (58.1)	81 (63.3)	19 (43.2)	0.162
Thrombopenia n, (%)	13 (7.6)	9 (7.0)	2 (4.5)	0.906
Severe AE, n (%)	78 (45.3)	55 (42.9)	23 (52.3)	0.298
TRM, n (%)	8 (4.7)	3 (2.3)	5 (11.4)	0.027
Abbreviations: AE, adverse event; TRM, treatment-related mortality. Footnote: All adverse events listed were grade ≥3 according to the Common Terminology Criteria for Adverse Events. The causes of death in patients aged ≥80 years were pneumonia (n = 2), COVID-19 (n = 1), sepsis (n = 1), and brain stroke (n = 1).
