# Supplementary material for: Polatuzumab vedotin, rituximab, cyclophosphamide, doxorubicin, and prednisone (Pola-R- CHP) therapy in diffuse large B-cell lymphoma in patients aged 80 years or older: A real- world study
Source: Research Square preprint supplement (doi:10.21203/rs.3.rs-7112709/v1), 2025-07-23
Supplement: Supplementary file 7 [file fd5b65662a36ceb895e7b5a6.xlsx]

## Sheet: Sheet1
Table 4. Multivariable logistic regression analysis of factors associated with treatment response
All patients (N = 151)	OR	95％ CI	P-value
Male	0.589	0.25-1.37	0.22
Average IDI of DXR and CPA	1.01	0.98-1.05	0.38
Average IDI of Pola	1.01	0.98-1.05	0.41
GNRI	1.04	0.99-1.08	0.07
IPI score	0.777	0.54-1.11	0.17
Age <80 years (n = 113)	OR	95％ CI	P-value
Male	0.761	0.28-2.04	0.59
Average IDI of DXR and CPA	1.01	0.95-1.06	0.84
Average IDI of Pola	1.01	0.96-1.07	0.7
GNRI	1.01	0.97-1.06	0.55
IPI score	0.674	0.44-1.03	0.069
Age ≥80 years (n = 38)	OR	95％ CI	P-value
Male	0.337	0.05-2.23	0.26
Average IDI of DXR and CPA	1.03	0.96-1.11	0.43
Average IDI of Pola	1.02	0.97-1.08	0.46
GNRI	1.09	1.00-1.19	0.045
IPI score	0.835	0.34-2.06	0.7
Abbreviations: OR, odds ratio; CI, confidence interval; IDI, initial dose intensity; DXR, doxorubicin; CPA, cyclophosphamide; Pola, polatuzumab vedotin; GNRI, Geriatric Nutritional Risk Index; IPI, International Prognostic Index.
